# Supplementary material for: Elastin-like recombinamers in collagen-based tubular gels improve cell-mediated remodeling and viscoelastic properties
Source: Royal Society of Chemistry journal article supplement (doi:10.1039/d0bm00292e), 2020-01-01
Supplement: d0bm00292e1.pdf [file d0bm00292e1.pdf]

**Table ESI1** Volume of each component (collagen, ELR-GTAR, ELR-RGD, neutralizing buffer and cell suspension) for preparing 1mL of the final cellularized solution at each condition. Initial concentration of collagen, ELR-GTAR and ELR-RGD solutions was 4 g/L.

| Proportion: | 2:             |                       |                            | 1:                        |                                          | 1                      | Final concentration |           |           |
|-------------|----------------|-----------------------|----------------------------|---------------------------|------------------------------------------|------------------------|---------------------|-----------|-----------|
|             | ELR:Col (%w/w) | Col ( $\mu\text{L}$ ) | ELR-GTAR ( $\mu\text{L}$ ) | ELR-RGD ( $\mu\text{L}$ ) | Neutralizing solution* ( $\mu\text{L}$ ) | PBS& ( $\mu\text{L}$ ) | Cell suspension#    | Col (g/L) | ELR (g/L) |
| 0           |                | 500                   | 0.0                        | 0.0                       | 250.0                                    | 0.0                    | 250.0               | 2.00      | 0.00      |
| 3           |                | 485                   | 7.5                        | 7.5                       | 242.5                                    | 7.5                    | 250.0               | 1.94      | 0.06      |
| 30          |                | 350                   | 75.0                       | 75.0                      | 175.0                                    | 75.0                   | 250.0               | 1.40      | 0.60      |
| 60          |                | 200                   | 150.0                      | 150.0                     | 100.0                                    | 150.0                  | 250.0               | 0.80      | 1.20      |

Notes:

\*Neutralizing solution: 3.5 $\times$  DMEM supplemented with 10 mM HEPES and 60 mM NaOH.

& PBS was added to complete the proportion of 2:1:1 since the ELR solutions did not need to be neutralized

#Cell suspension: 2  $\times$  10<sup>6</sup> HDFn /mL in DMEM supplemented with 10 % of FBS and 1% of Pen-Strep.

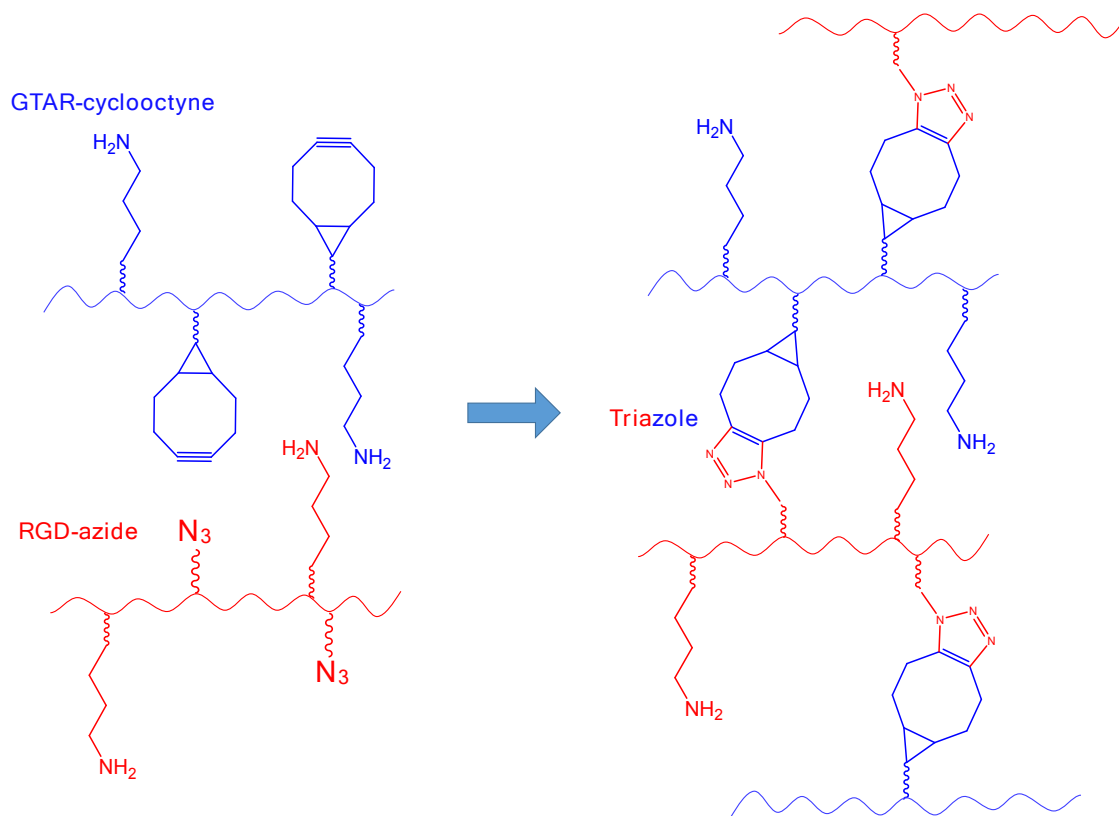

**Fig. ESI1** Triazole groups formed during SPAAC crosslinking reaction between the GTAR-cyclooctyne and RGD-azide click modified ELRs.

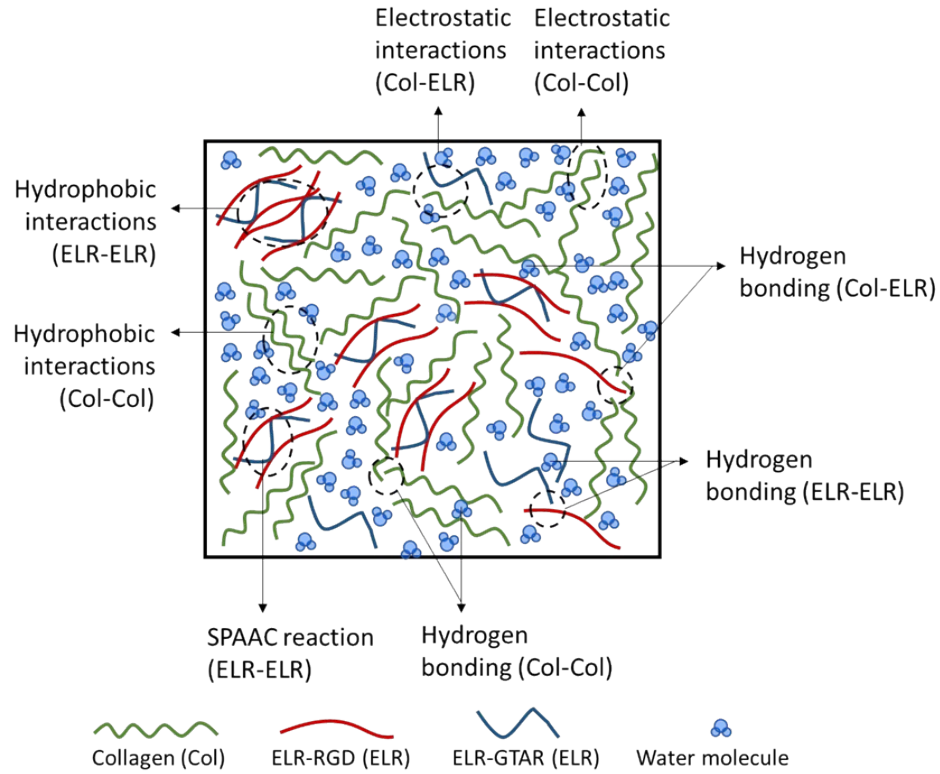

**Fig. ES12** Expected interchain and intrachain interactions between collagen and ELRs in the constructs. Hydrogen bonding can be direct or water-mediated bonding among the

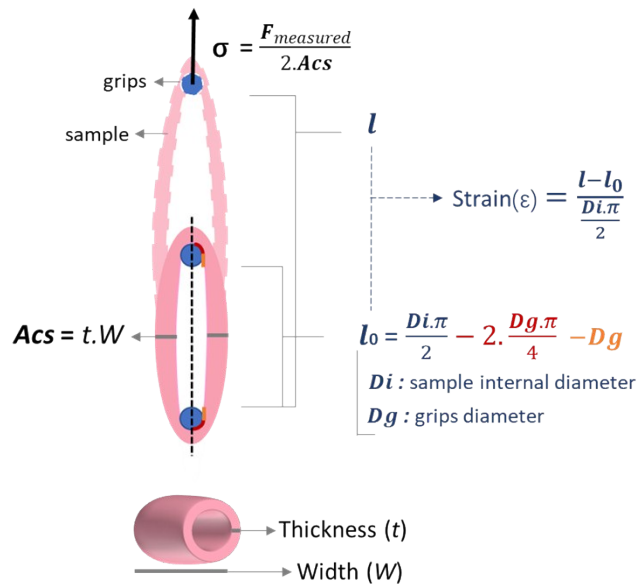

chains.

**Fig. ES13** Tensile stress relaxation testing: parameters for the calculation of stress and strain using the values of load and displacement of the grips.  $l_0$  was the initial distance

between the grips related to the position of zero force (sample was open but not yet stretched).

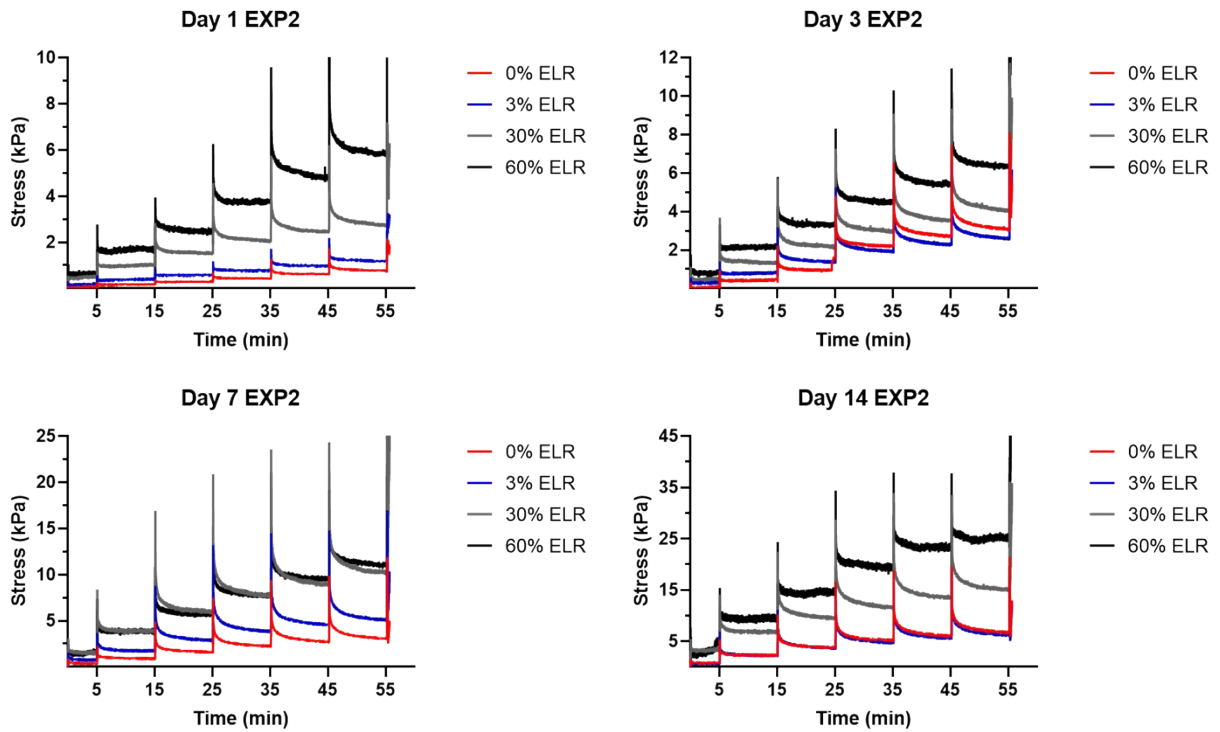

**Fig. ES14** Examples of stress relaxation curves for all conditions after 1, 3, 7 and 14 days of maturation. One sample per time point was evaluated in each one of the 4 experiments.
